# Supplementary material for: Inner reorganization during the radical–biradical transition in a nor-β-lapachone derivative possessing two redox centers
Source: Royal Society of Chemistry journal article supplement (doi:10.1039/b806271d), 2008-01-01
Supplement: b806271d.pdf [file b806271d.pdf]

## Supporting information for Manuscript

### “Inner Reorganization During the Radical-Biradical Transition in a Nor- $\beta$ -Lapachone Derivative Possessing Two Redox centres”

By

Dulce María Hernández, Maria Aline B. F. de Moura, Drochss Pettry Valencia, Felipe J. González, Ignacio González, Fabiane C. de Abreu, Eufrânio N. da Silva Júnior, Vitor F. Ferreira, Antônio Ventura Pinto, Marilia O. F. Goulart and Carlos Frontana

e-mail Carlos Frontana: [ultrabuho@yahoo.com.mx](mailto:ultrabuho@yahoo.com.mx)

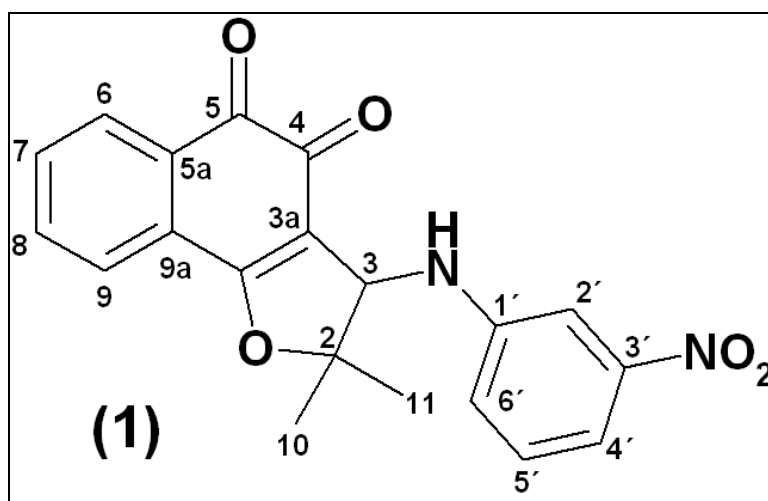

**Scheme 1.** Structure of the studied molecule, indicating numbering for each position

**Table 1.** Geometric parameters for the neutral (N), radical anion (RA) and biradical dianion (BD) structures calculated for compound **1** at the BLYP/TZVP level of theory (Distances appear in Angstroms and angles in degrees).

| Geometric parameter | N     | RA    | BD    |
|---------------------|-------|-------|-------|
| C-1 --- O-1         | 1.351 | 1.390 | 1.390 |
| C-2 --- O-1         | 1.536 | 1.506 | 1.506 |
| C-2 --- C-3         | 1.588 | 1.594 | 1.594 |
| C-3 --- C-3a        | 1.521 | 1.523 | 1.523 |
| C-3a --- C-4        | 1.438 | 1.448 | 1.448 |
| C-4 --- C-5         | 1.571 | 1.511 | 1.511 |
| C-4 --- O-4         | 1.241 | 1.271 | 1.271 |
| C-5 --- O-5         | 1.229 | 1.274 | 1.274 |
| C-5 --- C-5a        | 1.497 | 1.473 | 1.473 |
| C-5a --- C-6        | 1.397 | 1.414 | 1.414 |
| C-6 --- C-7         | 1.395 | 1.388 | 1.389 |
| C-7 --- C-8         | 1.396 | 1.414 | 1.414 |
| C-8 --- C-9         | 1.395 | 1.389 | 1.389 |
| C-9 --- C-9a        | 1.400 | 1.413 | 1.413 |
| C-9a --- C-5a       | 1.418 | 1.443 | 1.443 |
| C-2 --- C-11        | 1.524 | 1.529 | 1.529 |
| C-2 --- C-10        | 1.530 | 1.537 | 1.537 |
| C-3 --- N-3         | 1.481 | 1.478 | 1.478 |
| N-3 --- C-1'        | 1.408 | 1.427 | 1.427 |
| C-1' --- C-2'       | 1.410 | 1.403 | 1.403 |
| C-2' --- C-3'       | 1.389 | 1.419 | 1.419 |
| C-3' --- C-4'       | 1.397 | 1.421 | 1.422 |
| C-4' --- C-5'       | 1.392 | 1.385 | 1.385 |
| C-5' --- C-6'       | 1.398 | 1.409 | 1.409 |
| C-6' --- C-1'       | 1.408 | 1.414 | 1.414 |
| C-3' --- N-3'       | 1.492 | 1.409 | 1.409 |
| N-3' --- O-3'       | 1.255 | 1.318 | 1.318 |
| N-3' --- H-3'       | 1.021 | 1.020 | 1.020 |
| C-1 --- O-1 --- C-2 | 107.6 | 106.7 | 106.7 |

|                        |       |       |       |
|------------------------|-------|-------|-------|
| C-1 --- C-3a --- C-4   | 122.5 | 123.2 | 123.2 |
| C-3a --- C-4 --- C-5   | 115.4 | 115.9 | 115.9 |
| O-5 --- C-5 --- C-4    | 120.4 | 121.4 | 121.4 |
| C-5 --- C-4 --- O-4    | 120.1 | 122.1 | 122.1 |
| C-4 --- C-5 --- C-5a   | 118.2 | 118.2 | 118.2 |
| C-5 --- C-5a --- C-9a  | 121.1 | 122.5 | 122.5 |
| C-9a --- C-1 --- C-3a  | 124.9 | 123.9 | 123.9 |
| C-5a --- C-6 --- C-7   | 120.1 | 121.4 | 121.4 |
| C-6 --- C-7 --- C-8    | 120.3 | 120.4 | 120.4 |
| C-7 --- C-8 --- C-9    | 120.5 | 119.9 | 119.9 |
| C-8 --- C-9 --- C-9a   | 120.5 | 120.5 | 120.5 |
| C-9 --- C-9a --- C-5a  | 120.2 | 120.0 | 120.0 |
| C-9a --- C-5a --- C-6  | 119.4 | 117.8 | 117.8 |
| C-5a --- C-9a --- C-1  | 117.5 | 116.4 | 116.4 |
| C-3a --- C-1 --- O-1   | 114.8 | 114.4 | 114.4 |
| C-1 --- C-3a --- C-3   | 109.9 | 109.8 | 109.8 |
| C-3a --- C-3 --- C-2   | 101.3 | 101.2 | 101.2 |
| O-1 --- C-2 --- C-3    | 104.3 | 105.6 | 105.6 |
| O-1 --- C-2 --- C-10   | 105.6 | 105.7 | 105.7 |
| O-1 --- C-2 --- C-11   | 105.3 | 106.1 | 106.1 |
| C-10 --- C-2 --- C-11  | 112.9 | 112.3 | 112.3 |
| C-2 --- C-3 --- N-3    | 114.9 | 114.2 | 114.2 |
| C-3a --- C-3 --- N-3   | 110.3 | 112.7 | 112.7 |
| C-3 --- N-3 --- C-1'   | 122.6 | 120.7 | 120.7 |
| N-3 --- C-1' --- C-6'  | 123.1 | 122.3 | 122.3 |
| N-3 --- C-1' --- C-2'  | 118.3 | 118.2 | 118.2 |
| C-1' --- C-2' --- C-3' | 119.3 | 120.8 | 120.8 |
| C-2' --- C-3' --- C-4' | 123.0 | 119.4 | 119.4 |
| C-3' --- C-4' --- C-5' | 117.0 | 118.8 | 118.8 |
| C-4' --- C-5' --- C-6' | 121.8 | 122.5 | 122.5 |
| C-5' --- C-6' --- C-1' | 120.2 | 118.9 | 118.9 |
| C-6' --- C-1' --- C-2' | 118.6 | 119.5 | 119.5 |
| C-2' --- C-3' --- N-3' | 118.3 | 120.6 | 120.6 |

|                                                                 |        |        |        |
|-----------------------------------------------------------------|--------|--------|--------|
| C-3' --- N-3' --- O-3'                                          | 117.9  | 119.2  | 119.2  |
| O-5 --- C-5 --- C-4 --- O-4                                     | -5.0   | -0.8   | -0.8   |
| C-3a --- C-1 --- O-1 --- C-2                                    | 5.5    | 9.4    | 9.4    |
| C-1 --- O-1 --- C-2 --- C-3                                     | -12.0  | -14.7  | -14.7  |
| C-1 --- C-3a --- C-3 --- C-2                                    | -10.9  | -9.4   | -9.4   |
| O-1 --- C-2 --- C-3 --- N-3                                     | -105.6 | -107.0 | -107.0 |
| C-2 --- C-3 --- N-3 --- C-1'                                    | -96.1  | -93.5  | -93.5  |
| C-3 --- N-3 --- C-1' --- C-6'                                   | 16.5   | 16.7   | 16.7   |
| Improper torsion between line<br>C-1' --- C-6' and C-3a --- C-4 | 139.6  | 139.6  | 132.6  |
